# Supplementary material for: Global serum proteomic changes in water buffaloes infected with Fasciola gigantica
Source: Parasit Vectors. 2019 Jun 3;12:281. doi: 10.1186/s13071-019-3533-5 (PMC6547537; doi:10.1186/s13071-019-3533-5)
Supplement: Supplementary file 1 — Additional file 1: Table S1. Differentially expressed proteins identified in the present study. [file 13071_2019_3533_MOESM1_ESM.xlsx]

## Sheet: 3 DPI
Protein	FC	P-value	log2FC
A0A0A0MP92	1.24345	0.00972168	0.314345
A0A140T879	1.28234	0.00448594	0.358779
A0A140T881	1.6574	0.000140971	0.728925
A4FV05	1.24873	0.0175773	0.32046
A5D796	0.570977	0.0152725	-0.808496
A5D7R6	0.749201	7.98615e-05	-0.416575
A5PJ69	1.40926	0.00648913	0.494939
A5PJE3	1.44413	0.00252077	0.530204
A5PJT7	1.71298	7.26926e-05	0.776508
A5PK88	1.48202	0.00460332	0.567562
A6H7D3	0.7188	0.00102402	-0.476338
A6QLC4	1.64444	0.000700952	0.717596
A6QLL8	1.34025	0.000266776	0.422504
A6QLU1	1.25036	0.00334154	0.322342
A6QPF9	1.22664	0.0282995	0.294706
A6QPP2	0.70815	3.69973e-05	-0.497873
A7E306	1.78476	0.000509648	0.835729
A7MBB0	0.7499	0.00141565	-0.41523
A8YXY3	1.58534	0.000887855	0.664795
B0JYN3	1.21344	0.0384772	0.279107
B0JYN6	0.736298	0.0110724	-0.441639
B0JYP6	0.617264	0.000206244	-0.696041
B9UKL8	1.24572	0.0132405	0.31698
B9X245	1.52014	0.00555407	0.604202
E1B6Z6	1.3978	0.00870501	0.483159
E1BA00	2.66296	0.000201848	1.41303
E1BCJ2	1.20014	0.0218003	0.263202
E1BD43	1.29466	0.0396519	0.372578
E1BI98	1.20908	0.0488112	0.273907
E1BMJ0	0.773411	0.00180239	-0.370692
E1BMS0	0.629696	0.00142907	-0.667271
E1BPX8	1.7611	0.00462496	0.816475
F1MAV0	1.60827	0.00444148	0.685514
F1MM86	1.54808	0.0293065	0.630484
F1MMD7	1.34097	5.23372e-05	0.423279
F1MMP5	0.788683	0.00558167	-0.342482
F1MNM2	1.34732	0.0178175	0.43009
F1MNN7	1.68729	0.00191099	0.754707
F1MRZ6	1.36808	0.00149908	0.452156
F1MTP5	1.3782	0.00892147	0.462782
F1MVP0	1.35839	0.000560541	0.441899
F1MVX6	1.22895	0.00439926	0.297427
F1MW44	1.45489	0.00103757	0.540907
F1MX87	1.24547	0.011275	0.316687
F1N045	1.68009	0.0390131	0.748537
F1N102	1.45927	0.0284872	0.545248
F1N2F1	1.2898	0.0160841	0.367146
F1N3A1	0.71561	0.00303676	-0.482756
F1N401	1.44363	0.000886035	0.529696
F1N4M7	0.747225	0.00216835	-0.420386
F1N583	1.26381	0.000200508	0.337785
F1N5M2	1.20595	0.0134788	0.270167
F1N789	1.21363	0.000191855	0.279326
F2X047	1.83128	0.00619891	0.872849
F5XVA9	0.787979	0.00189027	-0.343772
G3MWG4	1.26833	0.0354094	0.342932
G3N033	0.540308	8.25941e-05	-0.888145
G3N0S9	0.826321	0.027077	-0.275225
G5E502	2.12283	0.0114959	1.08599
O18977	1.21075	0.0014333	0.275899
P01888	0.529934	0.00546922	-0.916115
P04272	1.28613	0.0417441	0.363041
P07507	1.4455	0.000785183	0.531569
P12799	1.91255	0.0121858	0.935495
P13213	0.711236	0.0174748	-0.491601
P18341	0.783512	0.0092586	-0.351972
P37141	1.67264	0.00331054	0.742129
P42916	1.36341	0.000318545	0.447221
P52556	1.24804	0.0270761	0.31966
P62992	0.762991	0.00312179	-0.390263
Q08DI9	1.26895	0.000510317	0.343635
Q0VCM4	1.23406	0.00127595	0.303418
Q0VCP3	1.40074	0.0440748	0.486193
Q148N0	1.29936	0.00214891	0.377799
Q27965	1.22766	0.000106718	0.29591
Q28107	1.40769	0.000174734	0.493333
Q2KIS7	0.715467	0.00103748	-0.483044
Q2KJ63	0.814879	0.0275558	-0.295342
Q3MHN0	1.43124	0.00504987	0.517266
Q3MHN2	1.53664	0.0379282	0.619783
Q3SZZ7	1.71422	0.00381273	0.77755
Q3YJH7	0.630103	0.0127701	-0.666342
Q3YJK3	0.821892	0.00505579	-0.282979
Q3ZC87	1.26778	0.0011694	0.3423
Q3ZCF0	1.35366	0.0336737	0.436863
Q58D62	1.72497	0.000120258	0.786567
Q5XQN5	0.808971	0.0127421	-0.30584
Q76LV2	1.38807	0.00272523	0.473079
Q92176	2.10059	0.000728572	1.07079
Q9BGU1	0.790943	0.00425468	-0.338354
Q9N2I2	1.20925	0.0343658	0.274107
Q9XSC6	1.23012	0.00409492	0.298801

## Sheet: 42 DPI
Protein	FC	P-value	log2FC
A0A077S9Q3	1.28484	0.00709427	0.361583
A0A0F6QMJ3	0.82713	0.000125412	-0.273813
A0A140T843	1.27779	0.00375266	0.353655
A4FV05	1.31827	4.63e-05	0.398645
A5D7S8	1.42092	0.0481047	0.506825
A6QM09	0.831985	0.0240829	-0.265371
A6QPR1	1.30462	0.0298334	0.38363
A6QQA8	1.52151	0.00718659	0.605508
C4T8B4	1.54102	0.0496354	0.623881
E1B805	1.91446	0.0132241	0.936937
E1BB91	0.664547	0.0117482	-0.589556
E1BCA5	1.27837	0.0107038	0.354301
E1BCJ2	1.65331	0.00388138	0.725355
E1BD43	1.29017	0.0455521	0.367563
E1BDY3	1.2709	0.00465973	0.345846
E1BFL8	1.21099	0.0064868	0.276185
F1MCK2	0.832637	0.00126486	-0.26424
F1MLW8	1.29122	0.00179372	0.368731
F1MM86	0.746458	0.00122338	-0.421867
F1MMK9	1.42136	0.00134536	0.507276
F1MQ37	1.30627	0.0185576	0.385456
F1MS32	1.37343	0.0229453	0.457784
F1MVP0	1.51445	0.0147239	0.598797
F1MY85	0.740341	0.0300021	-0.433738
F1N045	0.768525	0.00592389	-0.379835
F1N1W3	1.39765	0.0212465	0.483006
F1N269	1.45276	0.0476807	0.5388
F1N514	0.758477	0.00538328	-0.398822
F2X047	1.40944	0.031577	0.495123
G1K1X9	1.55179	0.0241743	0.633935
G3X6N3	1.39718	0.0018305	0.482516
G5E604	0.780483	0.0137304	-0.357561
O02659	1.39312	0.0257168	0.478319
O46375	1.32555	0.0114726	0.406596
P00743	1.76403	0.0381351	0.818871
P13384	0.690688	0.0319291	-0.533895
P17697	1.23845	0.0205631	0.308539
P18341	1.32594	0.0160278	0.407019
P23805	0.480667	9.11e-05	-1.05689
P35541	3.10529	0.0200056	1.63473
P56652	1.70816	0.00491723	0.772444
Q0VCM4	0.734514	0.0168104	-0.445138
Q27967	1.41073	0.012261	0.496447
Q28107	1.48417	0.0120678	0.569654
Q2KJF1	0.760652	0.000663977	-0.394691
Q2YDE3	1.23222	0.0228483	0.30126
Q3MHL4	0.736738	0.01659	-0.440777
Q3MHN0	0.782175	0.0101442	-0.354437
Q3SYR5	1.69591	0.00645981	0.762064
Q3SZR3	1.42584	0.033823	0.511808
Q3SZV7	1.23006	0.00676199	0.29873
Q3ZBS7	1.76075	0.0130532	0.816194
Q68RU0	1.43686	0.0198946	0.52292
Q7SIH1	1.44086	0.0317365	0.52693
Q92176	0.690523	1.74e-05	-0.534239
Q95121	1.40408	0.0104094	0.48963
Q9BGU1	0.748533	0.00376188	-0.417862
Q9N2I2	1.2969	0.00449782	0.375065
V6F9A3	1.36881	0.0253631	0.452927
A0A077S1J7	2.72049	0.00457231	1.44387
A5PKD6	0.70222	4.56e-05	-0.510006
A6QPD4	1.70239	0.0152417	0.767562
A7MAZ5	1.26987	0.0063782	0.344683
E1BDW7	1.30951	0.00466973	0.389023
E1BIY2	1.97851	0.00273806	0.984412
E1BPT8	1.52086	0.00407085	0.604889
F1MMA0	1.20715	0.0118576	0.271599
F1MNJ9	1.38075	0.000588111	0.465454
F1MPE1	1.2473	0.0497948	0.318811
F1MUU9	1.34732	0.0153289	0.430088
F1MXQ3	1.2939	0.0101912	0.371728
F1MZF2	1.3156	0.0233832	0.395717
G3MZ05	1.35599	0.00152471	0.439347
G9HR46	0.593546	0.0485049	-0.752568
O02717	1.43075	0.0198806	0.516768
P00829	0.797086	0.0150221	-0.327193
P11116	0.702103	0.00731989	-0.510246
P11151	1.33831	0.0111713	0.420418
P13135	0.822699	0.00662398	-0.281563
P13605	1.25097	0.00592593	0.323049
P68002	2.0304	0.0183954	1.02177
Q08E54	1.31274	0.00125929	0.392581
Q29RU2	1.47617	0.0065776	0.561854
Q2KII3	1.41447	4.24e-06	0.500264
Q2KJ46	1.56019	0.00841436	0.641722
Q3SYW7	1.36117	0.00123637	0.444849
Q3SZ79	1.2255	0.00415664	0.293373
Q3SZB7	0.658002	0.00842136	-0.603837
Q3SZH7	1.29696	0.0170988	0.37513
Q3T0L2	1.21451	4.11e-05	0.280376
Q3T0W4	0.765012	0.00584272	-0.386445
Q3ZCK9	0.802229	0.0222634	-0.317914
Q58D31	0.649578	0.00200304	-0.622425

## Sheet: 70 DPI
Protein	FC	P-value	log2FC
A0A077S9Q3	1.37295	0.00164392	0.457275
A0A140T8C8	0.825678	0.0422709	-0.276349
A5D7J6	1.37169	0.000114354	0.455958
A5D7R6	0.73223	1.04954e-06	-0.44963
A5D9E9	1.27728	0.0301713	0.353076
A5PJ69	1.26154	0.00162447	0.33519
A6H7J6	1.27205	0.000529835	0.347152
A6QPP2	0.801067	0.000515268	-0.320005
A6QR15	2.04777	0.000457583	1.03405
A7E3S8	1.51633	0.00171413	0.600587
A7E3W2	2.06614	0.0137843	1.04694
A8YXZ2	1.24242	0.0260565	0.313155
B0JYL8	1.72992	0.0188941	0.790706
B0JYN6	0.712352	0.00134816	-0.489337
B3VTM3	1.39759	0.0019012	0.482946
B9UKL8	1.30815	0.00455804	0.387526
C4T8B4	1.37021	0.0289015	0.454396
D4QBB3	1.50085	0.0412379	0.585776
E1B6Z6	1.36986	0.0139671	0.454031
E1BA00	0.621248	0.00455739	-0.686759
E1BCJ2	1.40957	0.0153777	0.495258
E1BD43	0.816371	0.00923028	-0.292703
E1BEL6	1.32124	0.00184386	0.40189
E1BH06	1.20923	0.0344569	0.274084
E1BI98	1.40242	0.00473622	0.487914
E1BLA8	0.752539	3.16375e-05	-0.410162
E1BMS0	0.775521	0.00985134	-0.366762
F1MAV0	0.744218	0.00211414	-0.426203
F1MB08	1.2779	0.00188243	0.353775
F1MDH3	1.71607	0.000621794	0.779104
F1MDS0	1.20511	0.00039003	0.269168
F1MH27	1.30472	0.00534999	0.383737
F1MJ12	1.23349	0.0378253	0.30275
F1MJK3	0.656548	3.36673e-07	-0.607028
F1MJQ1	2.24984	0.0237937	1.16982
F1MLW8	1.23987	0.0178904	0.31019
F1MM86	1.35737	0.00175136	0.440816
F1MMP5	0.804643	0.000630307	-0.31358
F1MQ37	1.41194	0.0187969	0.497679
F1MRD0	1.22208	0.00100683	0.289335
F1MTP5	1.43917	7.02434e-05	0.525234
F1MV90	1.96445	0.0159936	0.974126
F1MVK1	1.20086	0.036669	0.264064
F1N045	1.43825	0.00326548	0.524313
F1N102	1.29038	0.00730987	0.367793
F1N169	1.31942	0.00121686	0.399901
F1N269	1.75637	0.000653159	0.8126
F1N2F1	1.27683	0.00276614	0.352561
F1N3Q7	0.794965	6.57884e-05	-0.331037
F1N514	0.667552	0.0161534	-0.583048
F1N5M2	1.4326	0.00308435	0.51864
F1N6C0	1.70284	0.0153084	0.767943
F2X047	1.52638	0.00257609	0.610118
G1K1X9	1.41312	0.000115718	0.498887
G3MZT8	1.34155	0.00172961	0.423898
G5E502	1.43931	0.000237711	0.525376
G5E5T5	0.821699	0.0294944	-0.283318
O02659	3.02058	0.000133326	1.59482
P00741	1.24523	0.0138433	0.316414
P00743	1.35005	0.000437378	0.433013
P12799	0.751399	0.00166179	-0.412349
P23805	0.527914	9.8118e-05	-0.921626
P37141	1.21436	0.0203613	0.280202
P42916	1.43543	0.000784405	0.521479
P52556	1.24408	0.00701955	0.315079
P60661	1.32395	0.0160139	0.404852
P60712	1.51658	0.00168208	0.600825
P61223	1.70858	0.00546174	0.772802
P62992	1.29854	0.000820576	0.376892
P63103	1.44023	0.00663842	0.526304
Q08DI9	1.26119	0.0213782	0.33479
Q1L835	1.81959	0.023749	0.86361
Q1RMH5	1.32504	0.00561735	0.406036
Q27965	1.5338	1.34672e-05	0.617112
Q27967	1.26159	0.0345008	0.335242
Q2KIV9	1.22613	0.0326662	0.294106
Q2KJ63	0.799122	0.0208043	-0.323512
Q2KJF1	0.529875	1.47374e-08	-0.916277
Q2YDE4	1.22309	0.00104363	0.290535
Q32LP0	1.3825	0.00840513	0.46728
Q3B7M5	1.39739	0.00285327	0.482737
Q3MHN2	1.57312	0.000678386	0.653632
Q3MHN5	1.67687	0.00859833	0.745772
Q3SZP2	2.11336	0.00165764	1.07954
Q3T004	1.43139	0.0384522	0.517415
Q3ZBG0	1.29438	5.04079e-05	0.372257
Q3ZBT5	1.23084	0.00483823	0.299642
Q3ZBZ8	1.61354	0.000213565	0.690228
Q58DL9	0.578203	4.1532e-05	-0.790351
Q58DT9	1.58649	0.0108063	0.665837
Q5E9E3	1.35934	0.0210087	0.442908
Q5KR47	1.4884	0.0022148	0.57376
Q76LV2	1.29257	0.00422697	0.370246
Q9BGI3	1.79562	0.0129515	0.84448
Q9N2I2	0.813923	0.0347853	-0.297036
A0A140T894	1.45893	0.0241171	0.544908
A3KLR9	1.49216	7.99028e-05	0.577404
A4ZZF8	1.50549	0.0166705	0.590228
A5D7L1	1.48831	0.00431545	0.573671
A5PK69	1.34111	0.00160591	0.423422
A6QLQ6	2.011	0.00666845	1.00792
A6QPD4	1.95764	0.017023	0.969114
E1BIY2	1.20446	0.00096527	0.268381
E1BPN4	1.4311	0.000763908	0.517121
F1MBI1	1.26799	0.000518999	0.342543
F1MTT3	0.633447	0.00120836	-0.658704
F1N6Z0	1.47931	0.000784586	0.564922
F6Q234	1.35686	0.0201393	0.440274
G3X757	1.42085	0.000667613	0.506758
G5E589	1.40481	0.00273886	0.490378
O02717	1.55439	0.00908202	0.636353
O97680	1.47326	0.000453276	0.559013
P01966	1.38149	0.0163627	0.466223
Q1RMR4	1.23484	0.0360329	0.304321
Q29RU2	1.39129	7.96401e-05	0.476422
Q2KII3	0.825258	0.000784419	-0.277083
Q2KJ46	1.20412	0.0235122	0.267981
Q2KJD0	1.30779	0.0341894	0.387129
Q3MHP2	1.36692	0.0438002	0.450929
Q3ZCK9	1.27315	0.0142618	0.348403
Q5E9A1	1.31847	0.00240093	0.398864
Q5EA61	1.27093	0.0152069	0.345883
A3KMV5	1.2744	0.00150432	0.349817
A6QNU2	0.824569	0.0066368	-0.278287
B1H0W5	1.30678	0.0121871	0.386012
E1BC28	1.58219	0.00233417	0.661921
F1MGZ5	1.25639	0.000344306	0.329287
F1MH76	1.21877	0.000202766	0.285426
F1MHR4	1.56301	0.0018044	0.644331
F1MKY3	2.05704	0.021347	1.04057
F1MZ92	1.36684	0.0263832	0.450841
G5E507	1.24803	0.000434587	0.319657
H6V5H1	0.744581	0.0248538	-0.4255
P08728	0.79915	0.0494573	-0.323461
Q17QN3	1.21249	0.00676821	0.277974
Q32KN6	1.44011	0.00972203	0.526181
Q3T0Y5	1.59466	1.19956e-06	0.673251
Q56JZ9	1.52741	3.69149e-05	0.611091
